# Supplementary material
Source: PubMed Central journal article supplement (PMC3073677)
Supplement: NIHMS252420-supplement-01.pdf [file NIHMS252420-supplement-01.pdf]

| ENSEMBLE SUMMARY   |         |     |       |       |       |       |       |                          |        |
|--------------------|---------|-----|-------|-------|-------|-------|-------|--------------------------|--------|
| Score <sup>1</sup> | Average |     |       |       | StDev |       |       | IC <sub>50</sub><br>(nM) | Ligand |
|                    | Cpd     | Bin | Crash | Polar | Score | Crash | Polar |                          |        |
| 9.86               | 23      | 0   | -1.48 | 3.36  | 0.97  | 0.63  | 0.54  | 57                       | 35     |
| 9.28               | 38      | 0   | -1.26 | 3.19  | 2.25  | 0.45  | 1.00  | 60                       | S-5    |
| 8.88               | 45      | 0   | -1.52 | 3.29  | 0.60  | 0.54  | 0.57  | 60                       | R-5    |
| 10.85              | 7       | 1   | -1.71 | 3.24  | 0.60  | 0.40  | 0.47  | 88                       | R-36   |
| 10.71              | 9       | 1   | -1.81 | 3.32  | 0.64  | 0.48  | 0.48  | 88                       | S-36   |
| 11.67              | 2       | 1   | -1.12 | 3.84  | 0.73  | 0.36  | 0.52  | 180                      | R-13   |
| 10.36              | 15      | 1   | -1.56 | 3.53  | 0.46  | 0.64  | 0.73  | 180                      | S-13   |
| 9.79               | 25      | 1   | -1.79 | 2.89  | 0.76  | 0.49  | 0.51  | 200                      | R-33   |
| 9.79               | 26      | 1   | -2.05 | 2.99  | 0.72  | 0.44  | 0.53  | 200                      | S-33   |
| 11.71              | 1       | 1   | -1.25 | 3.12  | 0.70  | 0.39  | 0.25  | 210                      | R-12   |
| 10.52              | 13      | 1   | -1.79 | 3.10  | 0.51  | 0.50  | 0.34  | 210                      | S-12   |
| 10.39              | 14      | 1   | -1.69 | 3.01  | 0.76  | 0.34  | 0.42  | 290                      | 34     |
| 9.59               | 30      | 0   | -1.73 | 3.38  | 0.91  | 0.61  | 0.57  | 300                      | 23     |
| 7.91               | 56      | 0   | -0.57 | 3.08  | 1.83  | 0.19  | 0.77  | 360                      | 24     |
| 9.96               | 21      | 1   | -1.13 | 3.42  | 0.69  | 0.36  | 0.56  | 400                      | S-4    |
| 9.76               | 27      | 1   | -1.27 | 2.94  | 0.69  | 0.33  | 0.28  | 400                      | R-4    |
| 9.73               | 29      | 1   | -1.12 | 3.37  | 0.93  | 0.46  | 0.52  | 400                      | 29     |
| 10.14              | 18      | 1   | -1.88 | 3.07  | 0.91  | 1.26  | 0.43  | 750                      | S-14   |
| 9.73               | 28      | 1   | -2.44 | 3.26  | 2.46  | 1.25  | 0.86  | 750                      | R-14   |
| 9.48               | 34      | 1   | -1.83 | 3.68  | 1.18  | 0.62  | 0.85  | 1160                     | R-28   |
| 8.20               | 54      | 0   | -2.05 | 3.15  | 1.00  | 0.77  | 0.71  | 1160                     | S-28   |
| 10.17              | 17      | 1   | -1.45 | 3.10  | 1.32  | 1.08  | 0.50  | 1180                     | 7      |
| 9.43               | 36      | 1   | -1.08 | 3.31  | 1.19  | 0.52  | 0.46  | 1200                     | S-3    |
| 9.08               | 41      | 1   | -1.21 | 3.62  | 2.26  | 0.39  | 0.95  | 1200                     | R-3    |
| 9.96               | 22      | 1   | -2.21 | 3.45  | 0.88  | 0.67  | 0.85  | 1220                     | R-32   |
| 8.68               | 50      | 0   | -1.97 | 3.12  | 2.16  | 0.78  | 0.83  | 1220                     | S-32   |
| 10.98              | 4       | 0   | -1.80 | 3.21  | 1.84  | 0.78  | 0.66  | 1250                     | R-15   |
| 10.53              | 12      | 1   | -2.06 | 3.04  | 0.68  | 0.78  | 0.45  | 1250                     | S-15   |
| 9.14               | 40      | 1   | -0.95 | 2.94  | 3.15  | 0.43  | 1.06  | 1280                     | 6      |
| 9.56               | 31      | 1   | -0.86 | 3.20  | 0.79  | 0.37  | 0.49  | 1300                     | 2      |
| 10.97              | 6       | 0   | -1.33 | 3.21  | 1.04  | 0.54  | 0.29  | 1360                     | R-10   |
| 10.78              | 8       | 0   | -1.20 | 3.41  | 0.85  | 0.58  | 0.23  | 1360                     | R-9    |
| 10.25              | 16      | 0   | -2.01 | 3.12  | 0.60  | 0.83  | 0.19  | 1360                     | S-10   |
| 10.59              | 11      | 0   | -1.10 | 3.41  | 0.89  | 0.34  | 0.32  | 1380                     | R-31   |
| 10.03              | 19      | 1   | -1.71 | 3.26  | 0.51  | 0.51  | 0.57  | 1380                     | S-31   |
| 9.80               | 24      | 1   | -1.50 | 3.09  | 0.57  | 0.69  | 0.26  | 1380                     | S-9    |
| 11.35              | 3       | 0   | -0.91 | 3.24  | 0.65  | 0.29  | 0.18  | 1410                     | S-11   |
| 10.98              | 5       | 0   | -1.11 | 3.23  | 1.04  | 0.51  | 0.22  | 1410                     | R-11   |
| 9.47               | 35      | 1   | -1.63 | 2.67  | 0.71  | 0.55  | 0.34  | 1420                     | S-18   |
| 8.51               | 51      | 1   | -1.94 | 2.43  | 2.20  | 0.69  | 0.71  | 1420                     | R-18   |
| 9.55               | 32      | 1   | -1.52 | 3.58  | 0.77  | 0.54  | 0.45  | 1460                     | R-27   |
| 9.01               | 42      | 1   | -1.01 | 3.43  | 1.02  | 0.37  | 0.48  | 1460                     | 25     |
| 8.78               | 46      | 1   | -1.85 | 3.39  | 0.78  | 0.48  | 0.49  | 1460                     | S-27   |
| 10.70              | 10      | 0   | -1.56 | 3.45  | 1.46  | 1.32  | 0.50  | 1580                     | 8      |
| 9.97               | 20      | 0   | -1.57 | 3.92  | 0.76  | 0.59  | 0.48  | 2300                     | S-17   |
| 8.97               | 43      | 1   | -1.64 | 3.20  | 2.74  | 1.87  | 0.36  | 2300                     | R-17   |
| 8.95               | 44      | 1   | -2.40 | 2.58  | 0.79  | 1.03  | 0.40  | 2770                     | S-19   |
| 8.74               | 47      | 1   | -2.72 | 2.59  | 1.50  | 1.23  | 0.42  | 2770                     | R-19   |
| 9.32               | 37      | 1   | -0.74 | 3.14  | 0.80  | 0.31  | 0.51  | 3200                     | 1      |
| 8.26               | 53      | 1   | -3.49 | 2.91  | 2.27  | 2.29  | 0.66  | 3370                     | S-20   |
| 8.09               | 55      | 1   | -3.53 | 2.71  | 2.22  | 1.73  | 0.62  | 3370                     | R-20   |
| 9.52               | 33      | 1   | -0.88 | 3.28  | 0.84  | 0.28  | 0.36  | 3500                     | R-22   |
| 9.19               | 39      | 1   | -0.90 | 3.18  | 0.55  | 0.17  | 0.47  | 3500                     | S-22   |
| 4.90               | 58      | 1   | -7.32 | 2.71  | 3.15  | 4.29  | 0.91  | 4200                     | S-21   |
| 4.61               | 59      | 1   | -7.69 | 2.61  | 3.54  | 3.87  | 0.79  | 4200                     | R-21   |
| 8.69               | 49      | 1   | -1.64 | 3.40  | 2.23  | 0.59  | 0.98  | 5710                     | S-30   |
| 8.27               | 52      | 1   | -1.66 | 3.43  | 1.00  | 0.68  | 0.66  | 5710                     | R-30   |
| 4.29               | 60      | 1   | -8.26 | 2.58  | 2.95  | 2.61  | 0.58  | 7200                     | R-16   |
| 3.68               | 61      | 1   | -8.57 | 2.56  | 2.88  | 2.75  | 0.45  | 7200                     | S-16   |
| 8.70               | 48      | 1   | -1.37 | 3.63  | 1.06  | 0.35  | 0.56  | 14300                    | S-26   |
| 7.50               | 57      | 1   | -1.50 | 3.21  | 2.30  | 0.88  | 1.03  | 14300                    | R-26   |

  

| BINNING ANALYSIS |         |                   |
|------------------|---------|-------------------|
|                  | BIN SUM | % CORRECT BINNING |
| ENSEMBLE SUMMARY | 45      | 74%               |

<sup>1</sup>Score: Surflex-Dock uses an empirical scoring function that approximates  $-\log(K_d)$ . The scoring function is described in detail in reference 21.
